# Supplementary material for: Hypoxia-induced internalization of connexin 26 and connexin 43 in pulmonary epithelial cells is involved in the occurrence of non-small cell lung cancer via the P53/MDM2 signaling pathway
Source: PubMed Central journal article supplement — Int J Oncol. 2019 Sep 3;55(4):845–59. doi: 10.3892/ijo.2019.4867 (PMC6741836; doi:10.3892/ijo.2019.4867), 2019-09-03

Figure S1. A flow-chart depicting our experimental design. OSAH, obstructive sleep apnea-hypopnea; CX, connexin; MDM2, murine double minute-2; si, small interfering RNA;

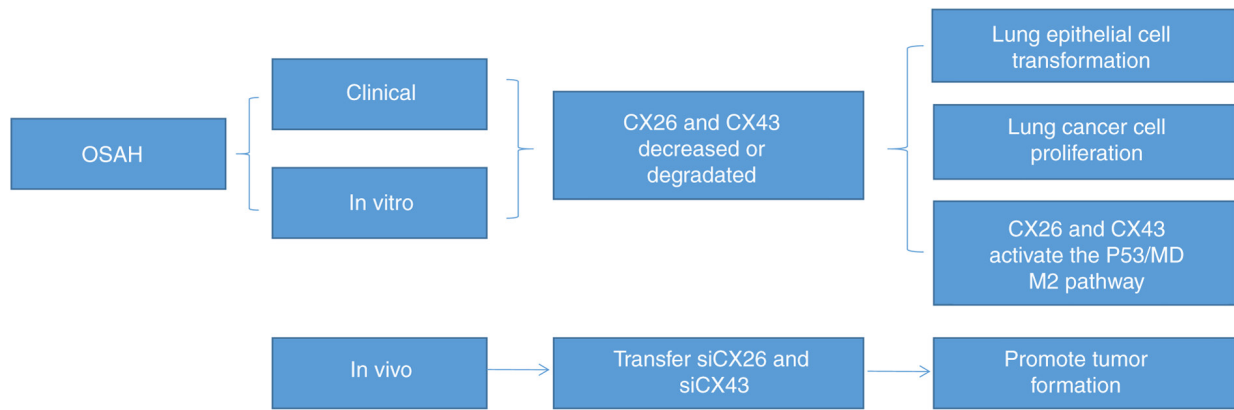

Supplement: Supplementary_Data.pdf [file Supplementary_Data.pdf]
